# Supplementary material for: First complete genome sequence of European turkey coronavirus suggests complex recombination history related with US turkey and guinea fowl coronaviruses
Source: PubMed Central journal article supplement (PMC7081074; doi:10.1099/jgv.0.000338), 2016-01
Supplement: jgv-97-110-s001.pdf [file jgv-97-110-s001.pdf]

**Table S1** : Accession N° and names of sequences used in this study

| Accession No | ID Name                                    |
|--------------|--------------------------------------------|
| AY514485     | IBVCal99 Subtype California 99             |
| AY319651     | IBV BJ                                     |
| AY641576     | IBVPeafowl GD KQ6 2003                     |
| DQ001338     | IBVBeaudette                               |
| DQ288927     | IBVSAIBK Chicken                           |
| DQ646405     | IBVTW2575 98                               |
| EU022525     | Turkey coronavirus TCoV-540                |
| EU022526     | Turkey coronavirus TCoV-ATCC               |
| EU095850     | Turkey coronavirus MG10 Turkey             |
| KR822424     | Fr-TCoV-080385d                            |
| EU526388     | IBVA2 4 91-like Subtype 4 91-like Chicken  |
| EU637854     | IBVCK CH LSD 051 Chicken                   |
| EU714029     | IBVSCO21202 Chicken                        |
| EU817497     | IBVH52 Chicken                             |
| FJ888351     | IBVH120 Chicken                            |
| FJ904713     | IBVMass41 2006-Massachusetts Chicken       |
| FJ904714     | IBVCal 1995-California Chicken             |
| FJ904715     | IBVCal557 2003-California Chicken          |
| FJ904721     | IBVMass41 1972-Massachusetts Chicken       |
| FJ904722     | IBVMass41 1979-Massachusetts Chicken       |
| FN430414     | IBVITA 90254 2005                          |
| FN430415     | IBVNGA A116E7 2006                         |
| GQ427173     | Turkey coronavirus TCoV VA-74 03 Turkey    |
| GQ427174     | Turkey coronavirus TCoV TX-GL 01 Turkey    |
| GQ427175     | Turkey coronavirus TCoV IN-517 94 Turkey   |
| GQ427176     | Turkey coronavirus TCoV TX-1038 98 Turkey  |
| GQ504720     | IBVArkansas DPI Chicken                    |
| GQ504721     | IBVArkansas Vaccine Chicken                |
| GQ504722     | IBVGeorgia 1998 pass8 Chicken              |
| GQ504723     | IBVGeorgia 1998 Vaccine Chicken            |
| GQ504725     | IBVMass41 Vaccine Chicken                  |
| GU393331     | IBV-GU393331-Cal56b Subtype Cal56b Chicken |
| GU393332     | IBV-GU393332- Delaware 072 Chicken         |
| GU393336     | IBV-GU393336-Holte Chicken                 |
| GU393337     | IBV-GU393337-Iowa 97 Chicken               |
| GU393338     | IBV GU393338-JMK Chicken                   |
| HM245923     | IBVDY07 Chicken                            |
| HM245924     | IBVCO4-1 Chicken                           |
| HQ848267     | IBVGX-YL5 Chicken                          |
| HQ850618     | IBVGX-YL9 Chicken                          |
| JF274479     | IBVCK CH LHLJ 07VII Chicken                |
| JF330898     | IBVck CH LHB 100801 Chicken                |
| JF705860     | IBVDK CH HN ZZ2004 Duck                    |
| JF732903     | IBVSCZY3 Chicken                           |
| JF828980     | IBVck CH LHLJ 100902 Chicken               |
| JF893452     | IBVYN Chicken                              |
| JQ088078     | IBVCK SWE 0658946 10 Chicken               |
| JQ977697     | IBVSNU8067 Chicken                         |
| JQ977698     | IBVKM91 Chicken                            |
| JX195175     | IBVck CH LDL 091022 Chicken                |
| JX195176     | IBVck CH LZJ 111113 Chicken                |
| JX195177     | IBVCK CH LDL 971 Chicken                   |
| JX195178     | IBVCK CH LDL 971 Chicken                   |
| JX840411     | IBVYX10 Chicken                            |
| JX897900     | IBVGX-NN09032 Chicken                      |
| KC008600     | IBVGX-C Chicken                            |
| KC013541     | IBVck CH LGD 120723 Chicken                |
| KC119407     | IBVck CH LGD 120724 Chicken                |
| KC136209     | IBVck CH LJJ 110302 Chicken                |
| KC506155     | IBVck CH LJJ 111054 Chicken                |
| KF377577     | IBV4 91 vaccine                            |
| KF411040     | IBVck CH LLN 111169 Chicken                |
| KF411041     | IBVck CH LGX 091109 Chicken                |
| KF574761     | IBVSDIB821 2012 Chicken                    |
| KF663559     | IBVck CH IBTZ 2012 Chicken                 |
| KF663560     | IBVck CH IBWF 2007 Chicken                 |
| KF663561     | IBVck CH IBYZ 2011 Chicken                 |
| KF668605     | IBVCK CH SD09 005                          |
| KF696629     | IBVConnecticut vaccine                     |
| NC010800     | IBVMG10 Turkey                             |

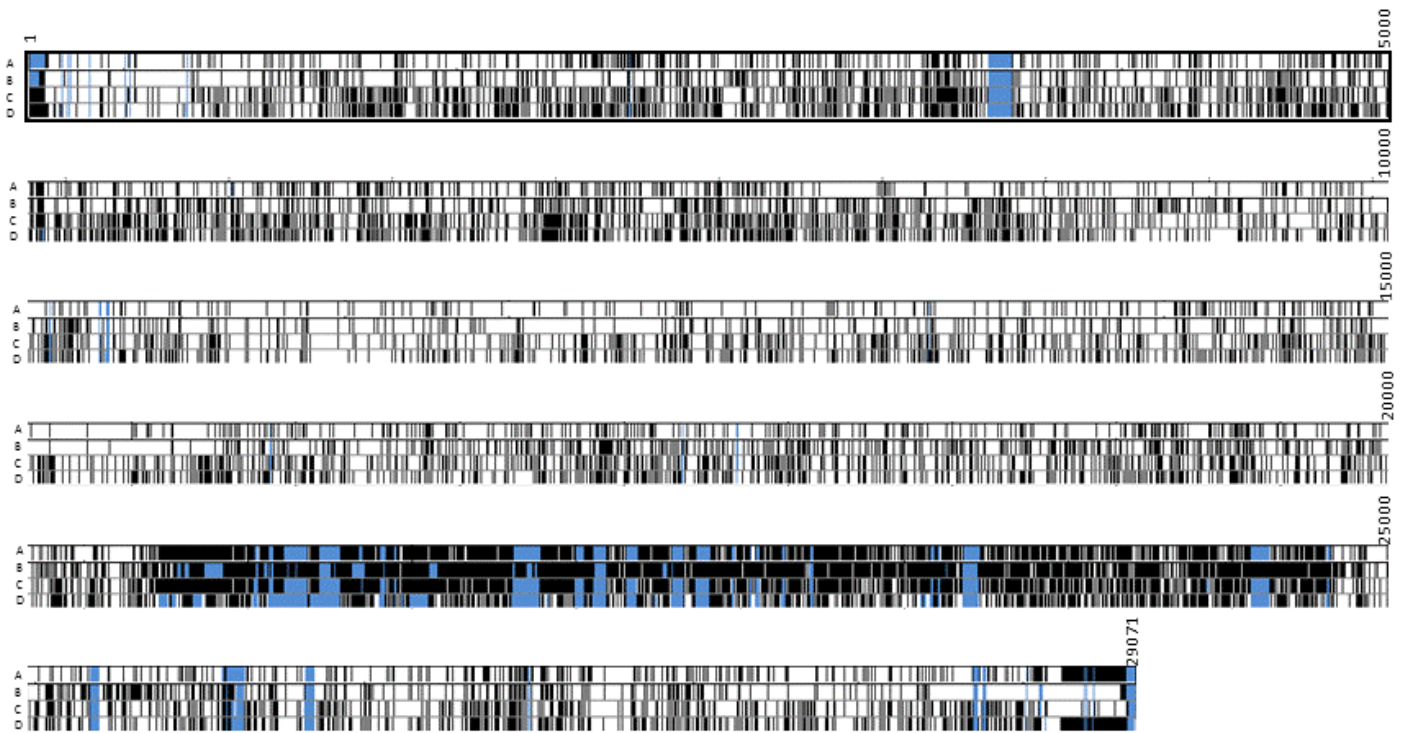

**Suppl Fig 1.** : Repartition of mutations between FrTCoV/GfCoV/ITA05/American TCoV based on an alignment of 69 full length avian gammacoronavirus genomes. A) Mutations observed between FrTCoV and GfCoV. B) Mutations observed between FrTCoV and ITA05. C) Mutations observed between FrTCoV and a consensus sequence of American TCoVs. D) Mutations observed between GfCoV and a consensus sequence of American TCoV. For each comparison, black regions correspond to the SNPs and blue regions correspond to a presence of gaps in two compared sequences
